# Supplementary material for: Severe injury-induced osteoporosis and skeletal muscle mineralization: Are these related complications?
Source: PubMed Central journal article supplement — Bone Rep. 2020 Dec 26;14:100743. doi: 10.1016/j.bonr.2020.100743 (PMC7804603; doi:10.1016/j.bonr.2020.100743), 2020-12-26
Supplement: mmc1.pdf [file mmc1.pdf]

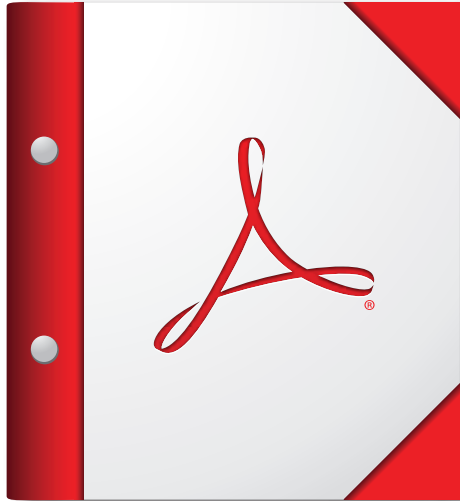

**For the best experience, open this PDF portfolio in  
Acrobat X or Adobe Reader X, or later.**

[Get Adobe Reader Now!](#)
